# Supplementary material for: Essential Oils from Colombian Plants: Antiviral Potential against Dengue Virus Based on Chemical Composition, In Vitro and In Silico Analyses
Source: MDPI journal article supplement (doi:10.3390/molecules27206844), 2022-10-12
Supplement: s1 [file s1]

# **Essential Oils from Colombian Plants: Antiviral Potential against Dengue Virus Based on Chemical Composition, In Vitro and In Silico Analyses**

**Lina Silva-Trujillo <sup>1</sup>, Elizabeth Quintero-Rueda <sup>1</sup>, Elena E. Stashenko <sup>1</sup>, Sergio Conde-Ocazonez <sup>2</sup>, Paola Rondón-Villarreal <sup>2</sup>, and Raquel E. Ocazonez <sup>1,\*</sup>**

<sup>1</sup> Centro de Cromatografía y Espectrometría de Masas, CROM-MASS, Universidad Industrial de Santander, Bucaramanga 680002, Santander, Colombia. (LST); (EQR); (EES); (REO)

<sup>2</sup> Instituto de Investigación Masira, Facultad de Ciencias de la Salud, Universidad de Santander, Bucaramanga 680003, Santander, Colombia. (SCO); (PRV)

\* Correspondence: Raquel E Ocazonez. [relocaz@uis.edu.co](mailto:relocaz@uis.edu.co)

**Table S1.** Chemical composition of essential oils studied in this work

| Compound                             | LRIs (DB-5MS |                   | LaCi | LaCif | LaCaf1 | LaCaf2 | LoP  | LoC  | LoT | LoTf | LoTC | TdS1 | TdS2 | PaS1 | ObS1 | VcS1 |
|--------------------------------------|--------------|-------------------|------|-------|--------|--------|------|------|-----|------|------|------|------|------|------|------|
|                                      | column)      |                   |      |       |        |        |      |      |     |      |      |      |      |      |      |      |
|                                      | Exp.         | Lit.              |      |       |        |        |      |      |     |      |      |      |      |      |      |      |
| <i>cis</i> -3-Hex-3-en-1-ol          | 853          | 850 <sup>a</sup>  | 0.2  | -     | -      | -      | -    | -    | -   | -    | -    | -    | -    | -    | -    | -    |
| $\alpha$ -Thujene                    | 927          | 930 <sup>a</sup>  | -    | -     | -      | -      | -    | 1.6  | -   | -    | 0.7  | -    | -    | -    | -    | -    |
| $\alpha$ -Pinene*                    | 935          | 932 <sup>a</sup>  | 0.3  | 0.2   | 0.2    | -      | 1.7  | 0.4  | -   | -    | 0.4  | -    | -    | 4.6  | 0.5  | 9.4  |
| Camphene*                            | 951          | 954 <sup>a</sup>  | -    | -     | 0.2    | -      | -    | 0.2  | -   | -    | -    | -    | -    | -    | -    | -    |
| Sabinene                             | 976          | 975 <sup>a</sup>  | -    | -     | -      | -      | -    | -    | -   | -    | -    | -    | -    | -    | 0.5  | 0.6  |
| Oct-1-en-3-ol                        | 978          | 980 <sup>b</sup>  | 0.2  | -     | 0.004  | -      | -    | -    | -   | -    | -    | -    | -    | -    | -    | -    |
| $\beta$ -Pinene*                     | 982          | 974 <sup>a</sup>  | -    | -     | -      | -      | -    | -    | -   | -    | -    | -    | -    | 1.2  | 1.0  | 4.1  |
| 6-Methyl-hept-5-en-2-one*            | 985          | 985 <sup>a</sup>  | 1.3  | 3.3   | -      | -      | -    | -    | -   | -    | -    | -    | -    | -    | -    | -    |
| $\beta$ -Myrcene*                    | 990          | 990 <sup>a</sup>  | -    | -     | 1.4    | -      | 1.3  | 2.4  | 0.4 | -    | 5.2  | 0.2  | 0.2  | 1.5  | 0.6  | 0.7  |
| Octan-3-ol                           | 994          | 991 <sup>a</sup>  | -    | -     | 0.02   | -      | -    | -    | -   | -    | -    | -    | -    | -    | -    | -    |
| $\alpha$ -Phellandrene               | 1005         | 1002 <sup>a</sup> | 0.1  | -     | -      | -      | 7.1  | -    | -   | -    | 0.5  | -    | -    | 4.4  | -    | -    |
| $\beta$ -Phellandrene                | 1009         | 1002 <sup>a</sup> | -    | -     | -      | -      | 1.4  | -    | -   | -    | -    | -    | -    | -    | -    | -    |
| $\Delta^3$ -Carene                   | 1012         | 1011 <sup>a</sup> | -    | -     | -      | -      | 0.7  | 0.1  | -   | -    | 0.3  | 0.2  | -    | 0.6  | -    | -    |
| $\alpha$ -Terpinene                  | 1020         | 1017 <sup>a</sup> | -    | -     | -      | -      | 0.5  | 1.7  | -   | -    | 2.9  | 1.3  | 1.6  | 0.8  | -    | -    |
| <i>p</i> -Cymene*                    | 1027         | 1024 <sup>a</sup> | -    | -     | -      | -      | 12.6 | 14.4 | 2.3 | 2.0  | 19.1 | 3.0  | 3.6  | 3.0  | -    | -    |
| Limonene*                            | 1034         | 1029 <sup>a</sup> | 2.4  | 5.9   | 82.2   | 0.9    | 2.1  | 0.3  | -   | -    | 0.9  | -    | -    | 6.0  | -    | 0.8  |
| 1,8-Cineol*                          | 1036         | 1031 <sup>a</sup> | -    | -     | -      | -      | 13.0 | 1.3  | -   | -    | -    | -    | -    | 3.6  | 8.1  | 0.8  |
| <i>cis</i> - $\beta$ -Ocimene        | 1046         | 1050 <sup>a</sup> | -    | -     | -      | -      | -    | -    | -   | -    | 1.2  | -    | -    | -    | -    | -    |
| <i>trans</i> - $\beta$ -Ocimene      | 1047         | 1050 <sup>a</sup> | -    | 0.4   | 1.0    | -      | -    | -    | -   | -    | 0.4  | -    | -    | 0.4  | 0.3  | -    |
| $\gamma$ -Terpinene                  | 1061         | 1059 <sup>a</sup> | -    | -     | -      | -      | 2.4  | 5.3  | 0.9 | 6.9  | 9.2  | 0.6  | 0.7  | 0.8  | -    | -    |
| <i>cis</i> -Sabinene hydrate         | 1072         | 1070 <sup>a</sup> | -    | -     | -      | -      | -    | 0.3  | -   | -    | -    | -    | -    | -    | -    | -    |
| Terpinolene                          | 1088         | 1088 <sup>a</sup> | -    | -     | -      | -      | -    | -    | -   | -    | 0.3  | -    | -    | 0.8  | -    | -    |
| $\alpha$ -Terpineol                  | 1098         | 1088 <sup>a</sup> | -    | -     | -      | -      | 0.5  | -    | -   | -    | -    | -    | 0.2  | -    | -    | -    |
| Linalool*                            | 1099         | 1096 <sup>a</sup> | 1.1  | 2.5   | 0.4    | 0.5    | 0.7  | 1.0  | -   | -    | 0.3  | -    | -    | 0.4  | 42.7 | -    |
| <i>trans-p</i> -Mentha-2,8-dien-1-ol | 1123         | 1122 <sup>a</sup> | -    | -     | 0.1    | 0.4    | -    | -    | -   | -    | -    | -    | -    | -    | -    | -    |
| <i>cis</i> -p-Menth-2-en-1-ol        | 1129         | 1123 <sup>b</sup> | -    | -     | -      | -      | -    | -    | -   | -    | -    | -    | -    | 0.5  | -    | -    |
| <i>cis</i> -Limonene oxide           | 1141         | 1136 <sup>a</sup> | -    | -     | 0.3    | 0.1    | -    | -    | -   | -    | -    | -    | -    | -    | -    | -    |

**Table S1.** Cont.

| Compound                                  | LRIs (DB-5MS<br>column) |                   | LaCi | LaCif | LaCaf1 | LaCaf2 | LoP  | LoC | LoT  | LoTf | LoTC | TdS1 | TdS2 | PaS1 | ObS1 | VcS1 |
|-------------------------------------------|-------------------------|-------------------|------|-------|--------|--------|------|-----|------|------|------|------|------|------|------|------|
|                                           | Exp.                    | Lit.              |      |       |        |        |      |     |      |      |      |      |      |      |      |      |
| <i>trans</i> - <i>p</i> -Menth-2-en-1-ol* | 1146                    | 1137 <sup>b</sup> | -    | -     | -      | -      | -    | -   | -    | -    | -    | -    | -    | 0.5  | -    | -    |
| Citronellal*                              | 1152                    | 1153 <sup>a</sup> | 0.7  | 1.1   | -      | -      | -    | -   | -    | -    | -    | -    | -    | -    | -    | -    |
| <i>cis</i> -Isocitral                     | 1164                    | 1164 <sup>a</sup> | 1.6  | 2.1   | -      | -      | -    | -   | -    | -    | -    | -    | -    | -    | -    | -    |
| Borneol*                                  | 1172                    | 1169 <sup>a</sup> | -    | -     | -      | 1.3    | -    | -   | -    | -    | -    | -    | -    | -    | -    | -    |
| Isogeranial                               | 1180                    | 1185 <sup>a</sup> | 2.1  | 2.8   | -      | -      | -    | -   | -    | -    | -    | -    | -    | -    | -    | -    |
| Terpinen-4-ol*                            | 1186                    | 1177 <sup>a</sup> | -    | -     | -      | -      | 0.9  | 0.5 | 0.8  | -    | 0.8  | -    | 0.1  | 0.3  | -    | -    |
| <i>cis</i> -Dihydrocarvone                | 1200                    | 1192 <sup>a</sup> | -    | -     | 0.4    | 2.0    | -    | -   | -    | -    | -    | -    | -    | -    | -    | -    |
| Estragole*                                | 1203                    | 1196 <sup>a</sup> | -    | -     | -      | -      | -    | -   | -    | -    | -    | -    | -    | -    | 18.6 | -    |
| <i>trans</i> -Dihydrocarvone              | 1208                    | 1200 <sup>a</sup> | -    | -     | 0.5    | 3.4    | -    | -   | -    | -    | -    | -    | -    | -    | -    | -    |
| Nerol*                                    | 1229                    | 1229 <sup>a</sup> | 2.5  | 2.2   | -      | -      | -    | -   | -    | -    | -    | -    | -    | -    | -    | -    |
| Thymol-methyl-ether                       | 1230                    | 1235 <sup>a</sup> | -    | -     | -      | -      | 0.8  | 1.9 | 1.3  | -    | 1.8  | -    | -    | -    | -    | -    |
| <i>cis</i> -Carveol                       | 1231                    | 1229 <sup>a</sup> | -    | -     | 0.1    | -      | -    | -   | -    | -    | -    | -    | -    | -    | -    | -    |
| <i>neo-iso</i> -Dihydrocarveol            | 1242                    | 1228 <sup>a</sup> | -    | -     | 0.1    | 0.8    | -    | -   | -    | -    | -    | -    | -    | -    | -    | -    |
| Ascaridole                                | 1246                    | 1237 <sup>c</sup> | -    | -     | -      | -      | -    | -   | -    | -    | -    | 0.4  | 0.4  | -    | -    | -    |
| Neral*                                    | 1246                    | 1252 <sup>b</sup> | 11.9 | 18.1  | -      | -      | -    | -   | -    | -    | -    | -    | -    | -    | -    | -    |
| Carvone*                                  | 1259                    | 1258 <sup>c</sup> | -    | -     | 12.2   | 78.2   | -    | -   | -    | -    | -    | -    | -    | -    | -    | -    |
| Geraniol*                                 | 1260                    | 1240 <sup>b</sup> | 19   | 8.1   | -      | -      | -    | -   | -    | -    | -    | -    | -    | -    | -    | -    |
| Piperitone*                               | 1265                    | 1264 <sup>c</sup> | -    | -     | -      | 4.8    | -    | -   | -    | -    | -    | -    | -    | 14.8 | -    | -    |
| Geranial*                                 | 1272                    | 1270 <sup>b</sup> | 24.5 | 24.8  | -      | -      | -    | -   | -    | -    | -    | -    | -    | -    | -    | -    |
| Bornyl acetate                            | 1289                    | 1285 <sup>a</sup> | -    | -     | -      | -      | -    | -   | -    | -    | -    | -    | -    | -    | -    | 0.9  |
| Thymol*                                   | 1290                    | 1290 <sup>a</sup> | -    | -     | -      | -      | 14.0 | 8.0 | 75.3 | 82.9 | 49.4 | -    | 0.2  | -    | -    | -    |
| Carvacrol*                                | 1300                    | 1298 <sup>a</sup> | -    | -     | -      | -      | 0.9  | 35  | 4.9  | 1.2  | 2.7  | -    | 0.4  | -    | -    | -    |
| <i>iso</i> -Ascaridole                    | 1310                    | 1307 <sup>c</sup> | -    | -     | -      | -      | -    | -   | -    | -    | -    | 0.3  | -    | -    | -    | -    |
| <i>trans</i> -Carvyl acetate              | 1346                    | 1342 <sup>a</sup> | -    | -     | -      | 0.1    | -    | -   | -    | -    | -    | -    | -    | -    | -    | -    |
| Thymyl acetate*                           | 1346                    | 1352 <sup>a</sup> | -    | -     | -      | -      | -    | -   | 1.6  | -    | 0.5  | -    | -    | -    | -    | -    |

**Table S1.** Cont.

| Compound                                   | LRIs (DB-5MS<br>column) |                   | LaCi | LaCif | LaCaf1 | LaCaf2 | LoP  | LoC | LoT | LoTf | LoTC | TdS1 | TdS2 | PaS1 | ObS1 | VcS1 |
|--------------------------------------------|-------------------------|-------------------|------|-------|--------|--------|------|-----|-----|------|------|------|------|------|------|------|
|                                            | Exp.                    | Lit.              |      |       |        |        |      |     |     |      |      |      |      |      |      |      |
| Piperitenone                               | 1347                    | 1343 <sup>a</sup> | -    | -     | 0.3    | 0.3    | -    | -   | -   | -    | -    | -    | -    | 14.8 | -    | -    |
| $\alpha$ -Cubebene                         | 1355                    | 1351 <sup>a</sup> | -    | -     | -      | -      | -    | -   | -   | -    | -    | -    | -    | 0.8  | -    | -    |
| Carvacryl acetate                          | 1366                    | 1372 <sup>a</sup> | -    | -     | -      | -      | -    | 2.0 | -   | -    | -    | -    | -    | -    | -    | -    |
| Neryl acetate                              | 1376                    | 1361 <sup>a</sup> | 0.4  | 0.6   | -      | -      | -    | -   | -   | -    | -    | -    | -    | -    | -    | -    |
| $\alpha$ -Ylangene                         | 1380                    | 1375 <sup>a</sup> | -    | -     | -      | -      | -    | -   | -   | -    | -    | -    | -    | -    | -    | 0.6  |
| Cyclosativene                              | 1382                    | 1374 <sup>c</sup> | -    | -     | -      | -      | -    | -   | -   | -    | -    | -    | -    | 1.6  | -    | -    |
| Isoledene                                  | 1382                    | 1376 <sup>a</sup> | -    | -     | -      | -      | -    | -   | -   | -    | -    | -    | -    | -    | -    | 0.5  |
| Geranyl acetate*                           | 1383                    | 1381 <sup>a</sup> | 2.8  | 4.8   | -      | -      | -    | -   | -   | -    | -    | -    | -    | -    | -    | -    |
| $\alpha$ -Copaene                          | 1385                    | 1376 <sup>a</sup> | -    | -     | -      | 0.3    | 0.6  | 0.7 | -   | -    | -    | -    | -    | 2.9  | -    | 7.0  |
| $\beta$ -Bourbonene                        | 1396                    | 1387 <sup>a</sup> | -    | -     | 0.3    | 3.8    | -    | -   | -   | -    | -    | -    | -    | -    | 0.6  | 1.1  |
| $\beta$ -Elemene                           | 1398                    | 1390 <sup>a</sup> | 2.6  | 1.2   | 0.1    | 1.5    | -    | -   | -   | -    | -    | 4.0  | 5.0  | 0.7  | 2.2  | 2.8  |
| $\alpha$ -Gurjunene                        | 1419                    | 1409 <sup>b</sup> | -    | -     | -      | -      | -    | -   | -   | -    | -    | -    | -    | 1.3  | -    | -    |
| $\alpha$ -Santalene                        | 1428                    | 1420 <sup>c</sup> | -    | -     | -      | -      | -    | -   | -   | -    | -    | -    | -    | 0.8  | -    | -    |
| $\beta$ -Copaene                           | 1433                    | 1432 <sup>a</sup> | -    | -     | -      | 0.6    | -    | -   | -   | -    | -    | -    | -    | -    | -    | -    |
| <i>trans</i> - $\beta$ -<br>Caryophyllene* | 1433                    | 1427 <sup>c</sup> | 9.1  | 13.3  | -      | 0.1    | 15.1 | 4.4 | 5.4 | 7.0  | 1.6  | 4.0  | 4.9  | 7.4  | 0.9  | 19.2 |
| $\beta$ -Gurjunene                         | 1437                    | 1432 <sup>a</sup> | -    | -     | -      | 0.4    | -    | 0.4 | -   | -    | -    | -    | -    | -    | -    | -    |
| <i>trans</i> - $\alpha$ -Bergamotene       | 1440                    | 1434 <sup>a</sup> | -    | -     | -      | -      | 0.5  | 0.3 | 1.0 | -    | -    | -    | -    | -    | 1.1  | -    |
| $\alpha$ -Guaiene                          | 1443                    | 1437 <sup>a</sup> | -    | 2.9   | -      | -      | -    | -   | -   | -    | -    | -    | -    | -    | 1.0  | -    |
| 6,9-Guaiadiene                             | 1451                    | 1444 <sup>a</sup> | -    | -     | -      | -      | -    | -   | -   | -    | -    | 1.3  | 1.8  | -    | -    | 1.6  |
| Aromadendrene                              | 1452                    | 1441 <sup>b</sup> | -    | -     | -      | -      | -    | -   | -   | -    | -    | -    | -    | 1.4  | -    | -    |
| <i>trans</i> - $\beta$ -Farnesene          | 1460                    | 1456 <sup>a</sup> | 0.5  | 0.1   | -      | 0.2    | -    | -   | -   | -    | -    | -    | -    | 0.6  | -    | -    |
| N.I. M <sup>+</sup> • <i>m/z</i> 204       | 1462                    | -                 | -    | -     | -      | -      | -    | -   | -   | -    | -    | -    | -    | -    | -    | 1.0  |
| $\alpha$ -Humulene*                        | 1467                    | 1468 <sup>c</sup> | 2.8  | 2.8   | -      | -      | 8.1  | 1.1 | 3.2 | -    | 0.9  | -    | 0.4  | 1.5  | 2.5  | 2.7  |
| $\gamma$ -Muurolene                        | 1473                    | 1479 <sup>a</sup> | -    | -     | -      | -      | 0.6  | -   | -   | -    | -    | -    | -    | 1.5  | -    | 0.6  |
| <i>trans</i> -Muurola-<br>4(14),5-diene    | 1475                    | 1493 <sup>a</sup> | -    | -     | -      | -      | -    | -   | -   | -    | -    | -    | -    | -    | 0.7  | -    |

**Table S1.** Cont.

| Compound | LRIs (DB-5MS<br>column) |  | LaCi | LaCif | LaCaf1 | LaCaf2 | LoP | LoC | LoT | LoTf | LoTC | TdS1 | TdS2 | PaS1 | ObS1 | VcS1 |
|----------|-------------------------|--|------|-------|--------|--------|-----|-----|-----|------|------|------|------|------|------|------|
|----------|-------------------------|--|------|-------|--------|--------|-----|-----|-----|------|------|------|------|------|------|------|

|                                            | Exp. | Lit.              |     |     |     |     |     |     |     |   |   |      |      |     |     |      |
|--------------------------------------------|------|-------------------|-----|-----|-----|-----|-----|-----|-----|---|---|------|------|-----|-----|------|
| <i>trans</i> -9- <i>epi</i> -Caryophyllene | 1477 | 1466 <sup>a</sup> | -   | -   | -   | 0.3 | -   | -   | -   | - | - | -    | -    | -   | -   | -    |
| N.I. M <sup>+</sup> • <i>m/z</i> 180       | 1477 | -                 | -   | -   | -   | -   | -   | 0.4 | -   | - | - | -    | -    | -   | -   | -    |
| <i>trans</i> -Cadina-1(6),4-diene          | 1482 | 1476 <sup>a</sup> | -   | -   | -   | -   | -   | -   | -   | - | - | -    | -    | 1.1 | -   | -    |
| Aristolochene                              | 1483 | 1488 <sup>a</sup> | -   | -   | -   | -   | -   | -   | -   | - | - | 17.9 | 20.9 | -   | -   | -    |
| N.I. M <sup>+</sup> • <i>m/z</i> 180       | 1484 | -                 | -   | -   | -   | -   | -   | 6.1 | -   | - | - | -    | -    | -   | -   | -    |
| Germacrene D*                              | 1492 | 1481 <sup>a</sup> | 4.3 | 1.5 | 0.1 | -   | 0.9 | -   | -   | - | - | -    | -    | 1.7 | 4.9 | 12.3 |
| Premnaspirodienene                         | 1499 | 1505 <sup>a</sup> | -   | -   | -   | -   | -   | -   | -   | - | - | 3.7  | 4.7  | -   | -   | -    |
| β-Selinene                                 | 1502 | 1490 <sup>a</sup> | -   | -   | -   | -   | 0.5 | 0.3 | -   | - | - | 5.2  | 5.8  | -   | -   | -    |
| Valencene                                  | 1503 | 1496 <sup>a</sup> | -   | -   | -   | -   | -   | -   | -   | - | - | 7.4  | 6.5  | 1.2 | -   | -    |
| Viridiflorene                              | 1503 | 1496 <sup>a</sup> | -   | -   | -   | -   | -   | -   | -   | - | - | -    | -    | -   | -   | 2.4  |
| Viridiflorol                               | 1503 | 1496 <sup>a</sup> | -   | -   | -   | -   | -   | -   | -   | - | - | -    | -    | 6.5 | -   | 1.6  |
| α-Muurolene                                | 1506 | 1500 <sup>a</sup> | -   | -   | -   | -   | 0.9 | -   | -   | - | - | -    | -    | -   | -   | 0.6  |
| Geranyl isobutyrate                        | 1506 | 1515 <sup>a</sup> | 1.2 | 0.3 | -   | -   | -   | -   | -   | - | - | -    | -    | -   | -   | -    |
| Bicyclogermacrene                          | 1509 | 1500 <sup>a</sup> | -   | -   | -   | -   | -   | -   | -   | - | - | -    | -    | 2.8 | 2.2 | 3.9  |
| α-Selinene                                 | 1509 | 1498 <sup>a</sup> | -   | -   | -   | -   | -   | 0.8 | -   | - | - | 1.6  | 1.7  | -   | -   | -    |
| α-Bulnesene                                | 1510 | 1509 <sup>a</sup> | -   | 0.6 | -   | -   | -   | -   | -   | - | - | -    | -    | -   | 1.1 | -    |
| δ-Amorphene                                | 1515 | 1511 <sup>c</sup> | -   | -   | -   | -   | -   | -   | -   | - | - | -    | -    | 1.0 | -   | -    |
| <i>trans</i> -β-Guaiene                    | 1517 | 1502 <sup>a</sup> | 2.2 | -   | -   | -   | -   | -   | -   | - | - | -    | -    | -   | -   | 11.8 |
| β-Bisabolene                               | 1517 | 1505 <sup>a</sup> | -   | -   | -   | -   | 0.8 | 0.8 | 0.8 | - | - | -    | -    | -   | -   | -    |
| γ-Cadinene                                 | 1523 | 1513 <sup>a</sup> | -   | -   | -   | -   | 0.5 | 0.3 | -   | - | - | -    | -    | 0.7 | 3.7 | -    |
| δ-Cadinene                                 | 1528 | 1523 <sup>a</sup> | -   | -   | -   | -   | 1.2 | 1.1 | -   | - | - | -    | 0.3  | 5.5 | -   | 2.8  |
| <i>cis</i> -Calamenene                     | 1530 | 1529 <sup>a</sup> | -   | -   | -   | -   | 0.5 | -   | -   | - | - | -    | -    | -   | 0.4 | -    |
| <i>trans</i> -γ-Bisabolene                 | 1533 | 1531 <sup>a</sup> | -   | -   | -   | -   | -   | 0.4 | -   | - | - | -    | -    | -   | -   | -    |
| 7- <i>epi</i> -α-Selinene                  | 1533 | 1534 <sup>c</sup> | -   | -   | -   | -   | -   | -   | -   | - | - | 0.5  | 0.6  | -   | -   | -    |
| Zonarene                                   | 1534 | 1529 <sup>a</sup> | -   | -   | -   | -   | -   | -   | -   | - | - | -    | -    | 1.2 | -   | -    |
| α-Cadinene                                 | 1535 | 1538 <sup>a</sup> | -   | -   | -   | -   | -   | -   | -   | - | - | -    | -    | 0.6 | -   | 0.6  |

**Table S1.** Cont.

| Compound                             | LRIs (DB-5MS |      |      |       |        |        |     |     |     |      |      |      |      |      |      |      |
|--------------------------------------|--------------|------|------|-------|--------|--------|-----|-----|-----|------|------|------|------|------|------|------|
|                                      | column)      |      | LaCi | LaCif | LaCaf1 | LaCaf2 | LoP | LoC | LoT | LoTf | LoTC | TdS1 | TdS2 | PaS1 | ObS1 | VcS1 |
|                                      | Exp.         | Lit. |      |       |        |        |     |     |     |      |      |      |      |      |      |      |
| N.I. M <sup>+</sup> • <i>m/z</i> 222 | 1539         | -    | -    | -     | -      | -      | -   | 0.2 | -   | -    | -    | -    | -    | -    | -    | -    |
| N.I. M <sup>+</sup> • <i>m/z</i> 204 | 1544         | -    | -    | -     | -      | -      | -   | 0.4 | -   | -    | -    | -    | -    | -    | -    | -    |

|                                                       |      |                   |     |     |   |   |     |     |     |   |     |     |     |     |     |     |
|-------------------------------------------------------|------|-------------------|-----|-----|---|---|-----|-----|-----|---|-----|-----|-----|-----|-----|-----|
| <i>trans</i> - $\alpha$ -Bisabolene                   | 1545 | 1544 <sup>c</sup> | 2.0 | 0.3 | - | - | -   | -   | -   | - | -   | -   | -   | -   | -   | -   |
| Selina-3,7(11)-diene                                  | 1552 | 1546 <sup>a</sup> | -   | -   | - | - | -   | -   | -   | - | -   | -   | -   | -   | -   | 1.0 |
| N.I. M <sup>+</sup> • <i>m/z</i> 222                  | 1554 | -                 | -   | -   | - | - | -   | 1.7 | -   | - | -   | -   | -   | -   | -   | -   |
| Elemol                                                | 1556 | 1548 <sup>a</sup> | -   | -   | - | - | -   | -   | -   | - | -   | 0.2 | 0.3 | -   | -   | -   |
| N.I. M <sup>+</sup> • <i>m/z</i> 204                  | 1557 | -                 | -   | -   | - | - | -   | -   | -   | - | -   | -   | -   | -   | -   | 0.8 |
| <i>trans</i> -Nerolidol                               | 1562 | 1563 <sup>a</sup> | -   | -   | - | - | 0.9 | 0.7 | -   | - | -   | -   | -   | -   | 0.5 | 1.3 |
| Zierone                                               | 1564 | 1574 <sup>c</sup> | -   | -   | - | - | -   | -   | -   | - | -   | -   | 0.3 | -   | -   | -   |
| Germacren D-4-ol                                      | 1585 | 1575 <sup>c</sup> | -   | -   | - | - | -   | -   | -   | - | -   | -   | -   | 0.4 | -   | -   |
| Spathulenol                                           | 1591 | 1578 <sup>a</sup> | -   | -   | - | - | -   | -   | -   | - | -   | -   | -   | 1.9 | 0.8 | -   |
| Caryophyllene oxide*                                  | 1595 | 1583 <sup>a</sup> | 1.8 | 0.1 | - | - | 2.5 | 0.9 | 1.3 | - | 0.4 | 3.3 | 3.2 | 3.8 | -   | 0.6 |
| Guaiol                                                | 1606 | 1600 <sup>a</sup> | -   | -   | - | - | 0.6 | -   | -   | - | -   | 3.5 | 3.3 | -   | -   | 0.7 |
| Humulene epoxide II                                   | 1625 | 1608 <sup>a</sup> | -   | -   | - | - | 1.0 | -   | 0.5 | - | -   | -   | -   | -   | -   | -   |
| 1,10-di- <i>epi</i> -Cubenol                          | 1629 | 1619 <sup>a</sup> | -   | -   | - | - | -   | -   | -   | - | -   | -   | -   | -   | 0.9 | -   |
| <i>neo</i> -Intermedeol                               | 1632 | 1631 <sup>c</sup> | -   | -   | - | - | -   | -   | -   | - | -   | 1.3 | 1.2 | -   | -   | -   |
| <i>epi</i> - $\alpha$ -Cadinol                        | 1640 | 1640 <sup>c</sup> | -   | -   | - | - | -   | 0.9 | -   | - | -   | -   | -   | 0.8 | 4.2 | -   |
| Intermedeol                                           | 1640 | 1658 <sup>a</sup> | -   | -   | - | - | -   | -   | -   | - | -   | -   | -   | -   | -   | 0.6 |
| $\gamma$ -Eudesmol                                    | 1644 | 1632 <sup>a</sup> | -   | -   | - | - | 1.0 | 0.2 | -   | - | -   | -   | -   | -   | -   | -   |
| N.I. M <sup>+</sup> • <i>m/z</i> 220 + <i>m/z</i> 204 | 1647 | -                 | -   | -   | - | - | 0.5 | -   | -   | - | -   | -   | -   | -   | -   | -   |
| <i>epi</i> - $\alpha$ -Muurolol                       | 1655 | 1642 <sup>c</sup> | -   | -   | - | - | -   | -   | -   | - | -   | -   | -   | 0.2 | -   | -   |
| Eudesm-7(11)-en-4-ol                                  | 1696 | 1700 <sup>a</sup> | -   | -   | - | - | -   | -   | -   | - | -   | 1.2 | 1.0 | -   | -   | -   |
| $\alpha$ -Eudesmol                                    | 1670 | 1653 <sup>a</sup> | -   | -   | - | - | 2.6 | 0.3 | -   | - | -   | -   | -   | 0.8 | -   | -   |
| Pogostol                                              | 1671 | 1660 <sup>c</sup> | -   | -   | - | - | -   | -   | -   | - | -   | 2.8 | 3.3 | -   | -   | -   |
| $\alpha$ -Selin-11-en-4-ol                            | 1674 | 1659 <sup>a</sup> | -   | -   | - | - | -   | -   | -   | - | -   | -   | -   | -   | -   | 0.5 |

**Table S1.** Cont.

| Compound                              | LRIs (DB-5MS |                   | LaCi | LaCif | LaCaf1 | LaCaf2 | LoP | LoC | LoT | LoTf | LoTC | TdS1 | TdS2 | PaS1 | ObS1 | VcS1 |
|---------------------------------------|--------------|-------------------|------|-------|--------|--------|-----|-----|-----|------|------|------|------|------|------|------|
|                                       | column)      |                   |      |       |        |        |     |     |     |      |      |      |      |      |      |      |
|                                       | Exp.         | Lit.              |      |       |        |        |     |     |     |      |      |      |      |      |      |      |
| Germacra-4,5,10-trien-1- $\alpha$ -ol | 1680         | 1686 <sup>a</sup> | -    | -     | -      | -      | -   | -   | -   | -    | -    | 3.5  | 3.6  | -    | -    | -    |
| Valerenal                             | 1720         | 1716 <sup>c</sup> | -    | -     | -      | -      | -   | -   | -   | -    | -    | 0.6  | 0.6  | -    | -    | -    |
| Vetiselinenol                         | 1740         | 1730 <sup>a</sup> | -    | -     | -      | -      | -   | -   | -   | -    | -    | 2.1  | 1.7  | -    | -    | -    |

|                                         |      |                   |   |   |   |   |   |   |   |   |   |      |      |   |   |     |
|-----------------------------------------|------|-------------------|---|---|---|---|---|---|---|---|---|------|------|---|---|-----|
| Dehydrofukinone                         | 1827 | 1820 <sup>c</sup> | - | - | - | - | - | - | - | - | - | 25.4 | 19.3 | - | - | -   |
| <i>trans,trans</i> -Geranil<br>linalool | 2028 | 2026 <sup>a</sup> | - | - | - | - | - | - | - | - | - | -    | -    | - | - | 1.6 |

LRIs, linear retention indices calculated using *n*-alkanes C<sub>8</sub>-C<sub>25</sub> mixture on the DB-5MS (non-polar) column. *L. alba*: neat EO (LaCif) and light fraction (LaCif) of citral chemotype EO; limonene-rich fraction (LaCaf1) and carvone-rich fraction (LaCaf2) of carvone chemotype. *L. origanoides*: neat EO of phellandrene chemotype (LoP), carvacrol (LoC), thymol-carvacrol (LoTC), and thymol (LoT) chemotype; and thymol-rich fraction (LoTf) of thymol chemotype. Neat EOs of *T. diffusa* collected in 2019 (TdS1) and in 2016 (TdS2). Neat EOs of *O. basilicum* (ObS1), *P. auduncum* (PaS1) and *V. curassavica* (VcS1). Exp. Experimental. Lit. Literature <sup>a</sup>Adams, 2007; <sup>b</sup>Babushok et al., 2011; <sup>c</sup>NIST 2017. \* Standard compounds were used for confirmatory identification.

**Table S2.** Docking energies (kcal/mol) of essential oil terpenes with dengue virus serotype 2 proteins

| Compound                                   | Structural DENV-2 proteins |             |             |
|--------------------------------------------|----------------------------|-------------|-------------|
|                                            | E                          | C           | prM         |
| Epigallocatechin gallate: positive control | -7.85 ± 0.3                | -7.67 ± 0.4 | -7.37 ± 0.1 |
| 1,10-di- <i>epi</i> -Cubenol               | -6.02 ± 0.7                | -6.46 ± 0.4 | -5.12 ± 0.2 |
| 1,8-Cineol                                 | -4.76 ± 0.2                | -5.07 ± 0.2 | -4.24 ± 0.2 |
| 6,9-Guaiadiene                             | -7.30 ± 1.3                | -6.69 ± 0.1 | -5.15 ± 0.3 |
| 7- <i>epi</i> - $\alpha$ -Selinene         | -6.74 ± 1.0                | -6.52 ± 0.3 | -5.33 ± 0.1 |
| Eudesm-7(11)-en-4-ol                       | -6.91 ± 0.4                | -6.40 ± 0.3 | -5.38 ± 0.2 |
| Aristolochene                              | -6.60 ± 0.5                | -6.66 ± 0.3 | -5.41 ± 0.3 |
| Aromadendrene                              | -6.32 ± 0.9                | -6.53 ± 0.3 | -5.26 ± 0.1 |
| Ascaridole                                 | -6.12 ± 0.4                | -5.67 ± 0.1 | -4.88 ± 0.1 |
| Bicyclogermacrene                          | -6.29 ± 0.5                | -6.60 ± 0.3 | -5.14 ± 0.1 |
| Borneol                                    | -4.77 ± 0.2                | -4.54 ± 0.3 | -4.17 ± 0.1 |
| Bornyl acetate                             | -5.04 ± 0.2                | -5.29 ± 0.3 | -4.56 ± 0.1 |
| Camphene                                   | -5.55 ± 0.3                | -5.41 ± 0.2 | -4.14 ± 0.1 |
| Carvacrol                                  | -7.31 ± 0.4                | -6.08 ± 0.5 | -5.29 ± 0.4 |
| Carvacryl acetate                          | -7.52 ± 0.8                | -5.90 ± 0.2 | -5.29 ± 0.3 |
| Carvone                                    | -7.29 ± 0.9                | -5.99 ± 0.5 | -4.90 ± 0.3 |
| Caryophyllene oxide                        | -5.62 ± 0.3                | -6.46 ± 0.4 | -5.26 ± 0.1 |
| <i>cis</i> -Calamenene                     | -8.73 ± 0.8                | -6.91 ± 0.2 | -5.33 ± 0.1 |
| <i>cis</i> -Carveol                        | -6.98 ± 0.4                | -5.78 ± 0.4 | -4.77 ± 0.3 |
| <i>cis</i> -Dihydrocarvone                 | -6.48 ± 0.8                | -5.64 ± 0.3 | -4.51 ± 0.1 |
| <i>cis</i> -Isocitral                      | -6.08 ± 0.6                | -5.37 ± 0.1 | -4.78 ± 0.2 |
| <i>cis</i> -Limonene oxide                 | -6.71 ± 0.5                | -5.65 ± 0.5 | -4.74 ± 0.3 |
| <i>cis</i> -p-Menth-2-en-1-ol              | -6.17 ± 0.5                | -5.64 ± 0.2 | -4.64 ± 0.1 |
| <i>cis</i> -Sabinene hydrate               | -5.93 ± 0.5                | -5.81 ± 0.5 | -4.21 ± 0.3 |
| <i>cis</i> - $\beta$ -Ocimene              | -6.29 ± 0.5                | -5.50 ± 0.2 | -4.41 ± 0.1 |
| Citronellal                                | -5.94 ± 0.3                | -5.08 ± 0.3 | -4.03 ± 0.3 |
| Cyclosativene                              | -5.98 ± 0.4                | -6.39 ± 0.3 | -5.22 ± 0.1 |
| Dehydrofukinone                            | -6.39 ± 0.8                | -6.60 ± 0.5 | -5.52 ± 0.3 |
| Elemol                                     | -5.92 ± 0.5                | -6.04 ± 0.2 | -5.01 ± 0.1 |
| <i>epi</i> - $\alpha$ -Cadinol             | -6.38 ± 0.7                | -6.50 ± 0.3 | -5.29 ± 0.2 |
| <i>epi</i> - $\alpha$ -Muurolol            | -6.10 ± 0.6                | -6.22 ± 0.4 | -5.04 ± 0.1 |
| Estragole                                  | -6.69 ± 0.6                | -5.28 ± 0.1 | -4.79 ± 0.3 |
| Geranial                                   | -6.32 ± 0.3                | -5.22 ± 0.2 | -4.29 ± 0.3 |
| Geraniol                                   | -6.14 ± 0.4                | -5.24 ± 0.2 | -4.24 ± 0.3 |
| Geranyl acetate                            | -5.97 ± 0.7                | -5.69 ± 0.2 | -4.87 ± 0.2 |

**Table S2.** Cont.



| Compound                                   | E           | C           | prM         |
|--------------------------------------------|-------------|-------------|-------------|
| Geranyl isobutyrate                        | -6.07 ± 0.6 | -6.15 ± 0.1 | -5.10 ± 0.1 |
| Germacra-4,5,10-trien-1- $\alpha$ -ol      | -5.90 ± 0.6 | -6.34 ± 0.2 | -5.35 ± 0.2 |
| Germacren D-4-ol                           | -6.01 ± 0.7 | -6.37 ± 0.3 | -5.23 ± 0.2 |
| Germacrene D                               | -6.79 ± 1.1 | -6.49 ± 0.2 | -5.36 ± 0.1 |
| Guaiol                                     | -6.30 ± 0.7 | -6.85 ± 0.4 | -5.41 ± 0.1 |
| Humulene epoxide II                        | -5.64 ± 0.3 | -6.20 ± 0.4 | -5.29 ± 0.1 |
| <i>iso</i> -Ascaridole                     | -6.31 ± 0.5 | -5.52 ± 0.4 | -4.64 ± 0.2 |
| Isogeranial                                | -6.13 ± 0.5 | -5.34 ± 0.1 | -4.74 ± 0.2 |
| Limonene                                   | -7.24 ± 0.1 | -5.76 ± 0.6 | -4.60 ± 0.4 |
| Linalool                                   | -6.06 ± 0.4 | -4.87 ± 0.2 | -4.31 ± 0.2 |
| Intermedeol                                | -5.77 ± 0.4 | -6.59 ± 0.3 | -5.25 ± 0.0 |
| Isoledene                                  | -6.72 ± 0.7 | -6.74 ± 0.3 | -5.29 ± 0.1 |
| <i>neo</i> -Intermedeol                    | -6.34 ± 1.0 | -6.41 ± 0.3 | -5.19 ± 0.1 |
| <i>neo-iso</i> -Dihydrocarveol             | -5.04 ± 0.5 | -4.94 ± 0.3 | -4.15 ± 0.1 |
| Neral                                      | -6.16 ± 0.5 | -5.04 ± 0.2 | -4.21 ± 0.2 |
| Nerol                                      | -6.13 ± 0.4 | -5.27 ± 0.3 | -4.42 ± 0.2 |
| Neryl acetate                              | -6.32 ± 0.5 | -5.91 ± 0.1 | -5.16 ± 0.2 |
| <i>p</i> -Cymene                           | -7.27 ± 0.3 | -5.81 ± 0.5 | -4.89 ± 0.4 |
| Piperitenone                               | -6.81 ± 0.7 | -6.01 ± 0.3 | -5.07 ± 0.4 |
| Piperitone                                 | -6.82 ± 0.5 | -6.02 ± 0.4 | -4.65 ± 0.2 |
| Pogostol                                   | -5.90 ± 0.4 | -6.40 ± 0.2 | -5.30 ± 0.3 |
| Premnaspirodiene                           | -5.75 ± 0.4 | -6.44 ± 0.4 | -5.07 ± 0.2 |
| Sabinene                                   | -6.59 ± 0.3 | -5.86 ± 0.6 | -4.62 ± 0.3 |
| Selina-3,7(11)-diene                       | -6.61 ± 1.0 | -6.81 ± 0.3 | -5.18 ± 0.1 |
| Spathulenol                                | -6.17 ± 0.6 | -6.29 ± 0.3 | -5.49 ± 0.2 |
| Terpinen-4-ol                              | -6.38 ± 0.4 | -5.72 ± 0.6 | -4.81 ± 0.4 |
| Terpinolene                                | -7.03 ± 0.6 | -5.74 ± 0.5 | -4.89 ± 0.4 |
| Thymol                                     | -6.98 ± 0.5 | -5.98 ± 0.5 | -5.31 ± 0.3 |
| Thymol-methyl-ether                        | -7.11 ± 0.4 | -5.64 ± 0.2 | -4.99 ± 0.3 |
| Thymyl acetate                             | -7.01 ± 0.8 | -5.88 ± 0.2 | -5.19 ± 0.1 |
| <i>trans, trans</i> -Geranyl linalool      | -6.37 ± 0.3 | -6.61 ± 0.1 | -5.31 ± 0.2 |
| <i>trans</i> -9- <i>epi</i> -Caryophyllene | -5.60 ± 0.6 | -6.08 ± 0.3 | -5.32 ± 0.2 |
| <i>trans</i> -Cadina-1(6),4-diene          | -7.23 ± 1.2 | -6.74 ± 0.4 | -5.11 ± 0.0 |
| <i>trans</i> -Carvyl acetate               | -6.84 ± 1.0 | -6.03 ± 0.1 | -4.92 ± 0.2 |
| <i>trans</i> -Dihydrocarvone               | -7.23 ± 0.3 | -5.85 ± 0.3 | -4.84 ± 0.2 |
| <i>trans</i> -Muurola-4(14),5-diene        | -6.93 ± 1.4 | -6.81 ± 0.4 | -5.12 ± 0.4 |
| <i>trans</i> -Nerolidol                    | -5.87 ± 0.4 | -5.80 ± 0.2 | -4.63 ± 0.2 |

**Table S2.** Cont.

| Compound | E | C | prM |
|----------|---|---|-----|
|----------|---|---|-----|

|                                      |             |             |             |
|--------------------------------------|-------------|-------------|-------------|
| <i>trans-p</i> -Menth-2-en-1-ol      | -6.53 ± 0.5 | -5.58 ± 0.1 | -4.60 ± 0.1 |
| <i>trans-p</i> -Mentha-2,8-dien-1-ol | -6.14 ± 0.4 | -5.59 ± 0.2 | -4.50 ± 0.2 |
| <i>trans-α</i> -Bergamotene          | -6.07 ± 0.3 | -6.32 ± 0.3 | -4.97 ± 0.1 |
| <i>trans-α</i> -Bisabolene           | -6.91 ± 0.6 | -6.65 ± 0.1 | -5.50 ± 0.0 |
| <i>trans-β</i> -Caryophyllene        | -6.02 ± 0.4 | -6.63 ± 0.4 | -5.36 ± 0.2 |
| <i>trans-β</i> -Farnesene            | -6.43 ± 0.7 | -6.04 ± 0.1 | -5.01 ± 0.4 |
| <i>trans-β</i> -Guaiene              | -6.18 ± 1.0 | -6.70 ± 0.3 | -5.36 ± 0.3 |
| <i>trans-β</i> -Ocimene              | -6.49 ± 0.2 | -5.86 ± 0.3 | -4.45 ± 0.2 |
| <i>trans-γ</i> -Bisabolene           | -6.97 ± 0.7 | -6.28 ± 0.1 | -5.01 ± 0.2 |
| Valencene                            | -6.84 ± 0.9 | -6.50 ± 0.3 | -5.34 ± 0.2 |
| Valerenal                            | -6.01 ± 0.6 | -6.58 ± 0.2 | -5.26 ± 0.2 |
| Vetiselinol                          | -7.07 ± 0.8 | -6.59 ± 0.3 | -5.45 ± 0.1 |
| Viridiflorene                        | -8.13 ± 0.9 | -6.61 ± 0.2 | -5.42 ± 0.1 |
| Viridiflorol                         | -6.24 ± 0.5 | -6.09 ± 0.2 | -5.40 ± 0.2 |
| Zierone                              | -5.95 ± 0.5 | -6.53 ± 0.3 | -5.20 ± 0.3 |
| Zonarene                             | -7.46 ± 0.9 | -6.54 ± 0.3 | -5.10 ± 0.1 |
| $\alpha$ -Bulnesene                  | -7.42 ± 1.0 | -6.87 ± 0.4 | -5.42 ± 0.3 |
| $\alpha$ -Cadinene                   | -8.28 ± 1.1 | -6.72 ± 0.4 | -5.26 ± 0.1 |
| $\alpha$ -Copaene                    | -6.29 ± 0.5 | -6.60 ± 0.3 | -5.14 ± 0.1 |
| $\alpha$ -Cubebene                   | -7.62 ± 1.0 | -6.74 ± 0.3 | -5.40 ± 0.2 |
| $\alpha$ -Eudesmol                   | -6.37 ± 0.8 | -6.43 ± 0.4 | -5.47 ± 0.3 |
| $\alpha$ -Guaiene                    | -8.26 ± 1.1 | -6.73 ± 0.3 | -5.29 ± 0.2 |
| $\alpha$ -Gurjunene                  | -7.83 ± 1.0 | -5.72 ± 0.2 | -5.42 ± 0.2 |
| $\alpha$ -Humulene                   | -5.74 ± 0.7 | -6.50 ± 0.4 | -5.29 ± 0.3 |
| $\alpha$ -Muurolene                  | -5.87 ± 0.5 | -6.78 ± 0.4 | -5.27 ± 0.3 |
| $\alpha$ -Phellandrene               | -7.60 ± 0.2 | -7.38 ± 0.5 | -5.84 ± 0.2 |
| $\alpha$ -Pinene                     | -5.09 ± 0.3 | -5.48 ± 0.3 | -4.24 ± 0.1 |
| $\alpha$ -Santalene                  | -6.11 ± 0.5 | -6.34 ± 0.2 | -4.75 ± 0.1 |
| $\alpha$ -Selin-11-en-4-ol           | -6.75 ± 0.9 | -4.53 ± 0.3 | -5.26 ± 0.2 |
| $\alpha$ -Selinene                   | -7.98 ± 1.1 | -6.63 ± 0.2 | -5.19 ± 0.3 |
| $\alpha$ -Terpinene                  | -7.10 ± 0.6 | -5.78 ± 0.6 | -4.96 ± 0.4 |
| $\alpha$ -Terpineol                  | -6.67 ± 0.4 | -5.90 ± 0.5 | -4.70 ± 0.3 |
| $\alpha$ -Tujene                     | -6.16 ± 0.7 | -6.06 ± 0.3 | -4.69 ± 0.2 |
| $\alpha$ -Ylangene                   | -6.11 ± 0.3 | -6.63 ± 0.3 | -5.16 ± 0.3 |
| $\beta$ -Bisabolene                  | -7.83 ± 0.5 | -6.44 ± 0.2 | -5.55 ± 0.2 |
| $\beta$ -Bourbonene                  | -7.95 ± 0.9 | -6.76 ± 0.6 | -5.17 ± 0.2 |
| $\beta$ -Copaene                     | -6.22 ± 0.7 | -6.57 ± 0.3 | -5.18 ± 0.2 |
| $\beta$ -Elemene                     | -6.07 ± 1.0 | -6.04 ± 0.3 | -4.85 ± 0.0 |

**Table S2.** Cont.

| Compound | E | C | prM |
|----------|---|---|-----|
|----------|---|---|-----|

|                       |                 |                 |                 |
|-----------------------|-----------------|-----------------|-----------------|
| $\beta$ -Gurjunene    | $-7.83 \pm 1.0$ | $-6.72 \pm 0.2$ | $-5.42 \pm 0.2$ |
| $\beta$ -Myrcene      | $-6.12 \pm 0.3$ | $-5.08 \pm 0.4$ | $-4.08 \pm 0.2$ |
| $\beta$ -Phellandrene | $-6.99 \pm 0.5$ | $-6.03 \pm 0.6$ | $-4.92 \pm 0.3$ |
| $\beta$ -Pinene       | $-5.11 \pm 0.4$ | $-5.36 \pm 0.3$ | $-4.21 \pm 0.1$ |
| $\beta$ -Selinene     | $-7.71 \pm 1.2$ | $-6.53 \pm 0.3$ | $-5.38 \pm 0.1$ |
| $\gamma$ -Cadinene    | $-8.19 \pm 1.0$ | $-6.77 \pm 0.2$ | $-5.27 \pm 0.3$ |
| $\gamma$ -Eudesmol    | $-6.30 \pm 0.4$ | $-6.70 \pm 0.1$ | $-5.43 \pm 0.2$ |
| $\gamma$ -Muurolene   | $-5.87 \pm 0.5$ | $-6.79 \pm 0.4$ | $-5.27 \pm 0.3$ |
| $\gamma$ -Terpinene   | $-7.28 \pm 0.3$ | $-5.79 \pm 0.5$ | $-4.96 \pm 0.4$ |
| $\Delta^3$ -Carene    | $-5.86 \pm 0.4$ | $-5.86 \pm 0.4$ | $-4.27 \pm 0.1$ |
| $\delta$ -Amorphene   | $-7.96 \pm 1.0$ | $-6.80 \pm 0.3$ | $-5.25 \pm 0.2$ |
| $\delta$ -Cadinene    | $-8.41 \pm 0.9$ | $-6.67 \pm 0.3$ | $-5.47 \pm 0.3$ |

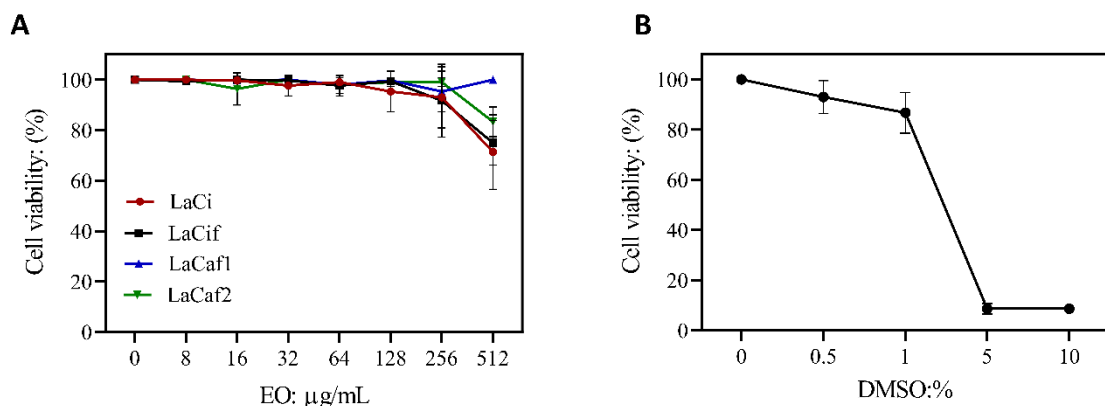

**Figure S1.** Representative results of the cytotoxicity assay. Essential oils and fractions of *L. alba* citral (LaCi and LaCif) and carvone (LaCaf1 and LaCaf2) chemotypes. Vero cells were cultured for 72 h in the presence of essential oil. Relative cell viability was measured by crystal violet quantification. Data represent averages and  $\pm$  SD of six independent measurements. Dimethyl sulfoxide (DMSO) is a positive control. The remaining ten essential oils studied (Table 1) showed similar results.
